# Supplementary material for: Evolution of Wetland Patterns and Key Driving Forces in China’s Drylands
Source: MDPI journal article supplement (doi:10.3390/rs16040702), 2024-02-17
Supplement: s1 [file s1]

## Supporting Information

# Evolution of Wetland Patterns and Key Driving Forces in China's Drylands

Xiaolan Wu <sup>1,2</sup>, Hui Zhao <sup>1\*</sup>, Meihong Wang <sup>1,2</sup>, Quanzhi Yuan <sup>2</sup>, Zhaojie Chen <sup>3</sup>, Shizhong Jiang <sup>2</sup>, Wei Deng <sup>2</sup>

1 Key Laboratory of Mountain Surface Processes and Ecological Regulation, Institute of Mountain Hazards and Environment, Chinese Academy of Sciences, Chengdu 610299, China

2 School of Geography and Resources Science, Sichuan Normal University, Chengdu 610101, China

3 School of Ecology and Environment, Xinjiang University, Urumqi 830046, China

\* Correspondence: zhaohui@imde.ac.cn

## **Method. Captions**

**Method S1:** Methods for mapping spatial dynamics of wetlands

**Method S2:** Statistical analysis of correlation results

## **Figure. Captions**

**Figure. S1** (a) ~ (d) Spatial distribution of wetland pattern index–precipitation correlation in the wetlands in China’s dryland.

**Figure. S2** (a) ~ (d) Spatial distribution of wetland pattern index–temperature correlation in the wetlands in China’s dryland.

**Figure.S3** (a) ~ (d) Spatial distribution of wetland pattern index–HDI correlation in the wetlands in China’s dryland.

**Table. Captions**

**Table. S1** Wetland dynamics in XJ from 1990 to 2020.

**Table. S2** Wetland dynamics in HCR from 1990 to 2020.

**Table S3** Main factors affecting wetland types in China's drylands

**Table S4** Variation trend of large lakes in China’s dryland.

**Method S1:** Methods for mapping spatial dynamics of wetlands

- (1) Using the ArcGIS10.6 "Intersect" and "Symmetrical Difference" tools to extract the increasing and shrinking wetlands in China's drylands from 1990-2020;
- (2) Construct an 8km×8km grid based on the China's drylands;
- (3) Based on the constructed grid, ArcGIS10.6 was used to statistically the proportion of wetland area in each grid using the "Zonal Statistics as Table" tool, and the findings were then spatialized.

## **Method S2:** Statistical analysis of correlation results

- (1) The correlation results were reclassified according to  $R > 0$ ,  $R < 0$  and the significance results were reclassified according to  $P > 0.05$ ,  $P < 0.05$  using ArcGIS;
- (2) Afterwards, the reclassification results were summed using a raster calculator, and the results obtained were categorized into:
  - Significant positive correlation ( $R > 0$ ,  $P > 0.05$ ),
  - Significant negative correlation ( $R < 0$ ,  $P < 0.05$ ),
  - No significant correlation ( $R > 0/R < 0$ ,  $P < 0.05$ ).
- (3) The results were partitioned and counted, and the results of correlation analysis of each type of wetland were obtained by mask extraction using the spatial distribution of each type of wetland in 2020;
- (4) Using the obtained correlation between precipitation and wetland index as well as the correlation between temperature and wetland index the resultant plots were used for image statistics to extract the climatic elements with the highest correlation for each image, and to derive the main climatic influences at this image point;
- (5) Compare the correlation between precipitation, temperature, HDI and wetland pattern index in the same way to find out the influencing factors with the highest correlation for each pixel, and add up the pixels with precipitation and climate as the main influencing factors to find out the number of climate factors as the main influencing factors.
- (6) The results were counted to obtain the main influencing factors of wetlands in China's dryland, XJ and HCR regions of China. And the spatial distribution of each type of wetland in 2020 was utilized for mask extraction to get the main influencing factors of each type of wetland.

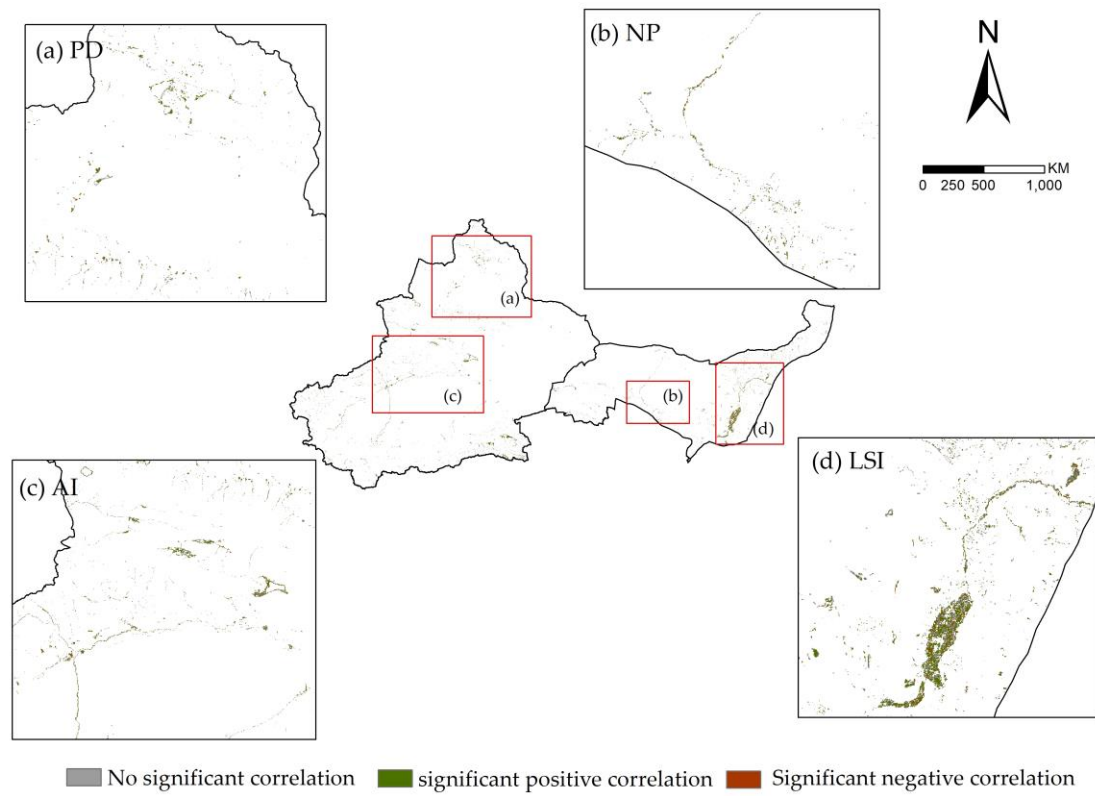

**Figure. S1** (a) ~ (d) Spatial distribution of wetland pattern index-precipitation correlation in the wetlands in China's dryland.

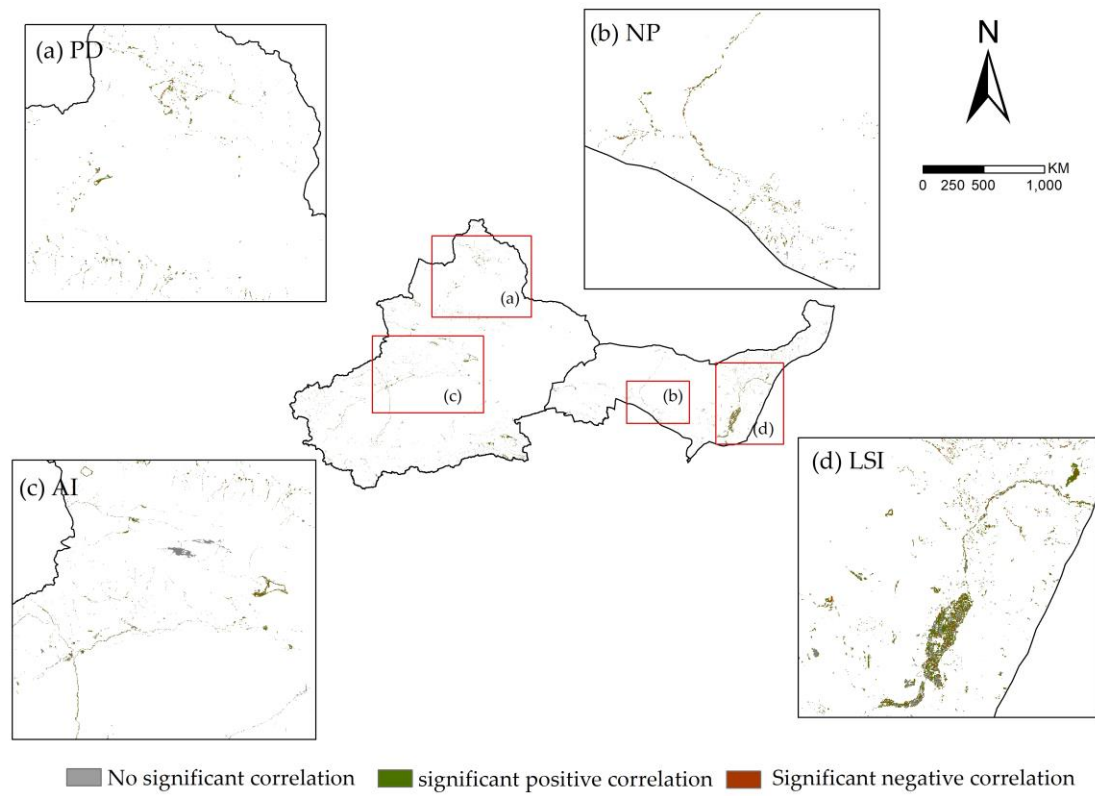

**Figure. S2** (a) ~ (d) Spatial distribution of wetland pattern index-temperature correlation in the wetlands in China's dryland.



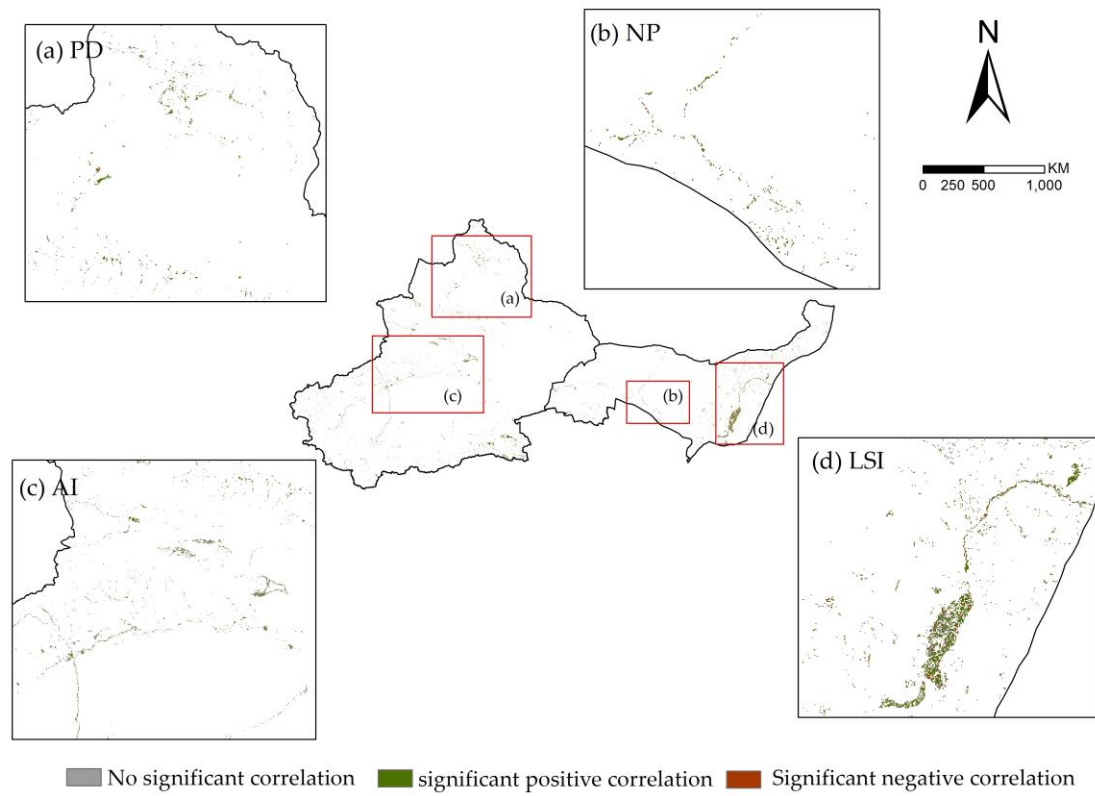

**Figure. S3** (a) ~ (d) Spatial distribution of wetland pattern index–HDI correlation in the wetlands in China's dryland.

**Table. S1** Wetland dynamics in XJ from 1990 to 2020.

| The transition of wetlands into other landscape types | Area/km <sup>2</sup> | The transition of wetlands from other landscape types | Area/km <sup>2</sup> | Changes in wetland area |
|-------------------------------------------------------|----------------------|-------------------------------------------------------|----------------------|-------------------------|
| River-Grassland                                       | 466.40               | Grassland-River                                       | 1052.57              | 586.17                  |
| River-Constructed land                                | 15.74                | Constructed land-River                                | 14.99                | -0.74                   |
| River-Farmland                                        | 269.38               | Farmland-River.                                       | 247.43               | -21.94                  |
| River-Forest                                          | 159.07               | Forest-River                                          | 228.96               | 69.89                   |
| River-Saline soil                                     | 11.62                | Saline soil-River                                     | 57.61                | 45.99                   |
| Lake-Grassland                                        | 354.62               | Grassland-Lake                                        | 1198.79              | 844.17                  |
| Lake-Constructed land                                 | 52.31                | Constructed land-Lake                                 | 5.61                 | -46.70                  |
| Lake-Farmland                                         | 119.79               | Farmland-Lake.                                        | 18.42                | -101.37                 |
| Lake-Forest                                           | 65.85                | Forest-Lake                                           | 53.57                | -12.27                  |
| Lake-Saline soil                                      | 127.18               | Saline soil-Lake                                      | 812.50               | 685.32                  |
| Artificial wetland-Grassland                          | 366.19               | Grassland-Artificial wetland                          | 423.85               | 57.66                   |
| Artificial wetland-Constructed land                   | 13.67                | Constructed land-Artificial wetland                   | 7.55                 | -6.12                   |
| Artificial wetland-Farmland                           | 225.25               | Farmland-Artificial wetland                           | 131.05               | -94.20                  |
| Artificial wetland-Forest                             | 22.14                | Forest-Artificial wetland                             | 41.43                | 19.29                   |
| Artificial wetland-Saline soil                        | 1.60                 | Saline soil-Artificial wetland                        | 215.93               | 214.33                  |
| Marsh-Grassland                                       | 1309.20              | Grassland-Marsh                                       | 1540.45              | 231.25                  |
| Marsh-Constructed land                                | 7.91                 | Constructed land-Marsh                                | 4.97                 | -2.94                   |
| Marsh-Farmland                                        | 507.08               | Farmland-Marsh.                                       | 126.14               | -380.94                 |
| Marsh-Forest                                          | 162.11               | Forest-Marsh                                          | 111.96               | -50.15                  |
| Marsh-Saline soil                                     | 184.99               | Saline soil-Marsh                                     | 250.04               | 65.05                   |

**Table. S2** Wetland dynamics in HCR from 1990 to 2020.

| The transition of wetlands into other landscape types | Area/km <sup>2</sup> | The transition of wetlands from other landscape types | Area/km <sup>2</sup> | Changes in wetland area |
|-------------------------------------------------------|----------------------|-------------------------------------------------------|----------------------|-------------------------|
| River-Grassland                                       | 150.57               | Grassland-River                                       | 277.83               | 127.26                  |
| River-Constructed land                                | 20.18                | Constructed land-River                                | 18.71                | -1.47                   |
| River-Farmland                                        | 157.56               | Farmland-River.                                       | 196.93               | 39.36                   |
| River-Forest                                          | 14.88                | Forest-River                                          | 37.46                | 22.58                   |
| River-Saline soil                                     | 9.89                 | Saline soil-River                                     | 46.46                | 36.57                   |
| Lake-Grassland                                        | 159.75               | Grassland-Lake                                        | 172.39               | 12.63                   |
| Lake-Constructed land                                 | 10.34                | Constructed land-Lake                                 | 8.02                 | -2.32                   |
| Lake-Farmland                                         | 55.75                | Farmland-Lake.                                        | 59.24                | 3.49                    |
| Lake-Forest                                           | 7.57                 | Forest-Lake                                           | 8.09                 | 0.52                    |
| Lake-Saline soil                                      | 136.42               | Saline soil-Lake                                      | 109.02               | -27.40                  |
| Artificial wetland-Grassland                          | 42.08                | Grassland-Artificial wetland.                         | 156.78               | 114.71                  |
| Artificial wetland-Constructed land                   | 22.42                | Constructed land-Artificial wetland.                  | 9.06                 | -13.37                  |
| Artificial wetland-Farmland                           | 92.38                | Farmland-Artificial wetland.                          | 154.07               | 61.69                   |
| Artificial wetland-Forest                             | 3.60                 | Forest-Artificial wetland                             | 14.65                | 11.05                   |
| Artificial wetland-Saline soil                        | 9.11                 | Saline soil-Artificial wetland                        | 65.36                | 56.25                   |
| Marsh-Grassland                                       | 780.25               | Grassland-Marsh                                       | 648.49               | -131.75                 |
| Marsh-Constructed land                                | 42.48                | Constructed land-Marsh                                | 18.04                | -24.44                  |
| Marsh-Farmland                                        | 134.07               | Farmland-Marsh.                                       | 107.13               | -26.94                  |
| Marsh-Forest                                          | 10.49                | Forest-Marsh                                          | 15.55                | 5.06                    |
| Marsh-Saline soil                                     | 380.08               | Saline soil-Marsh                                     | 347.21               | -32.87                  |

**Table S3** Main factors affecting wetland types in China's drylands

| Class              | Factors          | Index  |        |        |        |
|--------------------|------------------|--------|--------|--------|--------|
|                    |                  | PD     | NP     | LSI    | AI     |
| Lake               | Climatic factors | 49.59% | 41.42% | 40.11% | 39.48% |
|                    | HDI              | 50.41% | 58.59% | 59.89% | 60.52% |
| River              | Climatic factors | 50.65% | 49.55% | 58.83% | 44.53% |
|                    | HDI              | 49.35% | 50.44% | 41.18% | 55.47% |
| Marsh              | Climatic factors | 46.15% | 42.01% | 40.14% | 48.24% |
|                    | HDI              | 53.85% | 57.98% | 59.86% | 51.76% |
| Artificial wetland | Climatic factors | 41.20% | 49.17% | 49.55% | 48.79% |
|                    | HDI              | 58.80% | 50.82% | 50.45% | 51.21% |

**Table S4** Variation trend of large lakes in China's dryland

| region | Lakes                                       | time-scale | Change in area /km <sup>2</sup> | rate of change km <sup>2</sup> /a | Trends    |
|--------|---------------------------------------------|------------|---------------------------------|-----------------------------------|-----------|
| XJ     | Lake Ayakumura [1]                          | 1986-2019  | 544.50                          | 16.50                             | expansion |
|        | Lop Nor Potash Pool [1]                     | 2002-2019  | 215.50                          | 12.70                             | expansion |
|        | Lake Achikul [1]                            | 1986-2019  | 270.60                          | 8.20                              | expansion |
|        | Lake Titmar [1]                             | 1986-2019  | 163.90                          | 5                                 | expansion |
|        | Bosten Lake[2]                              | 1988-2018  | 83.85                           | 2.80                              | expansion |
|        | Ulungur Lake [3]                            | 1977-2017  | 79.90                           | 2                                 | expansion |
|        | Sayram Lake[4]                              | 2005-2015  | 4.50                            | 0.45                              | expansion |
|        | Ebinur [5]                                  | 1990-2021  | -59.52                          | -3.5                              | shrinkage |
| HCR    | Inner Mongolia Yellow River Basin Lakes [6] | 1990-2020  | -8.30                           | -0.40                             | shrinkage |
|        | Dalinor Lake[7]                             | 1976-2015  | -28                             | -0.67                             | shrinkage |
|        | Wuliangsu Sea [8]                           | 2008-2019  | -35.40                          | -3.20                             | shrinkage |

## References

1. Wang, W.; Samat, A.; Ma, L.; Ge, X.Y.; buduwail, J. Spatio-temporal variations and trend analysis of lake area in Xinjiang in 1986—2019. *Acta Ecol. Sin.* **2022**, *42*, 15. doi:10.5846 / stxb202101150156.(in Chinese)
2. Dai, X.A.; Yang, X.P.; Wang, M.L.; Gao, Y.; Liu, S.H.; Zhang, J.M. The Dynamic Change of Bosten Lake Area in Response to Climate in the Past 30 Years. *Water* **2020**, *12*, 4. doi:10.3390/w12010004.
3. Gao, F.; He, B.; Yan, Z.; Xue, S.; Li, Y. Analysis of the changes and driving force of the water area in the Ulungur Lake over the past 40 years. *Journal of water supply: Research and technology* **2020**, *69*, 500-511. doi:10.2166/aqua.2020.003.
4. Qin, Q.; Li, X.; Zhang, B.; Li, C.; Sun, T. Change of ice phenology in the Sayram Lake from 2000 to 2019. *Arid Land Geography* **2022**, *45*, 37-45. doi:10.12118/j.issn.1000 – 6060.2021. 029.
5. Sun, Q.; Sun, J.; Baidurela, A.; Li, L.; Hu, X.Y.; Song, T.W. Ecological landscape pattern changes and security from 1990 to 2021 in Ebinur Lake Wetland Reserve, China. *Ecological Indicators* **2022**, *145*, 109648. doi:10.1016/j.ecolind.2022.109648.
6. Yun, J.; Liu, H.M.; Xu, Z.C.; Cao, X.A.; Ma, L.Q.; Wen, L.; Zhuo, Y.; Wang, L.X. Assessing Changes in the Landscape Pattern of Wetlands and Its Impact on the Value of Wetland Ecosystem Services in the Yellow River Basin, Inner Mongolia. *Sustainability* **2022**, *14*, 10. doi:10.3390/su14106328.
7. Li, H.D.; Gao, Y.Y.; Li, Y.K.; Yan, S.G.; Xu, Y.Y. Dynamic of Dalinor Lakes in the Inner Mongolian Plateau and Its Driving Factors during 1976-2015. *Water* **2017**, *9*, 749. doi:10.3390/w9100749.
8. Tan, J.R.; Ma, Q.; Wang, R. Remote sensing monitoring of the dynamics of water area and aquatic vegetation over long time series. *YELLOW RIVER* **2021**, *43*, 77-79. doi:10.3969 / j.issn.1000-1379.2021.s2.031.(in Chinese)
